# Supplementary material
Source: publisher figshare collection journal article supplement (https://acs.figshare.com/ndownloader/files/4477111)
Supplement: Supplementary file 1 [file 4477111]

## Supporting Information

### **Patterned Growth of Vertically Aligned Organic Nanowire Waveguide Arrays**

*Yong Sheng Zhao<sup>†,§</sup>, Peng Zhan<sup>‡,§</sup>, Jaemyung Kim<sup>†</sup>, Cheng Sun<sup>‡,\*</sup>, and Jiaxing Huang<sup>†,\*</sup>*

<sup>†</sup>Department of Materials Science and Engineering, Northwestern University, Evanston, Illinois  
60208-3108,

<sup>‡</sup>Department of Mechanical Engineering, Northwestern University, Evanston, Illinois  
60208-3108.

§These authors contributed equally to this work.

\* E-mails: [c-sun@northwestern.edu](mailto:c-sun@northwestern.edu); [jiaxing-huang@northwestern.edu](mailto:jiaxing-huang@northwestern.edu)

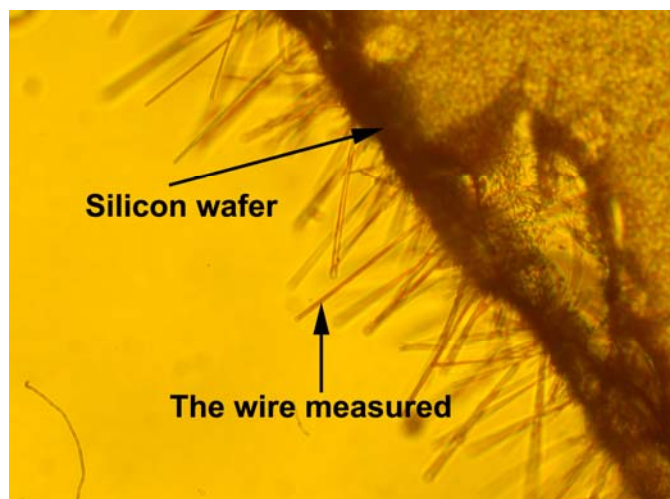

**Figure S1** Optical microscope images of the vertical DAAQ nanowires used for waveguide measurements.

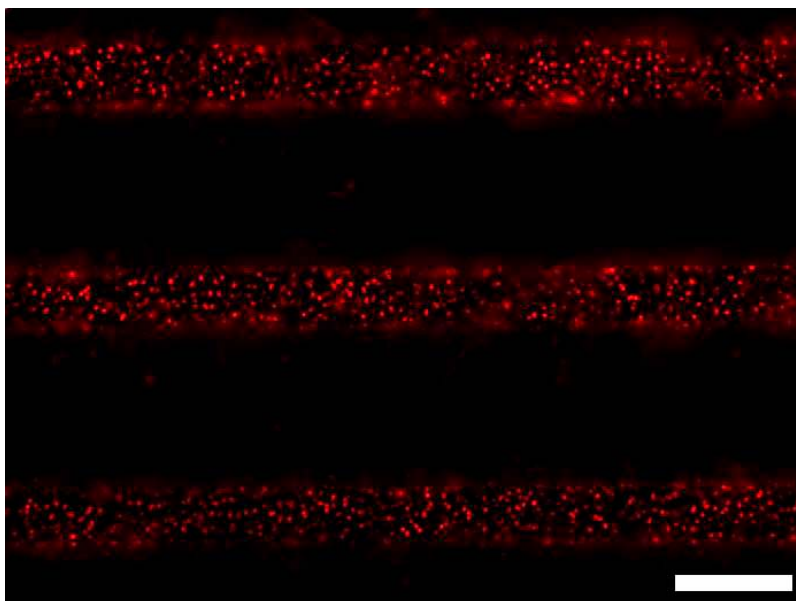

**Figure S2** Plane view PL microscopy of the physically patterned DAAQ nanowire arrays with scoured silicon wafers. Scale bar is 20  $\mu\text{m}$ .

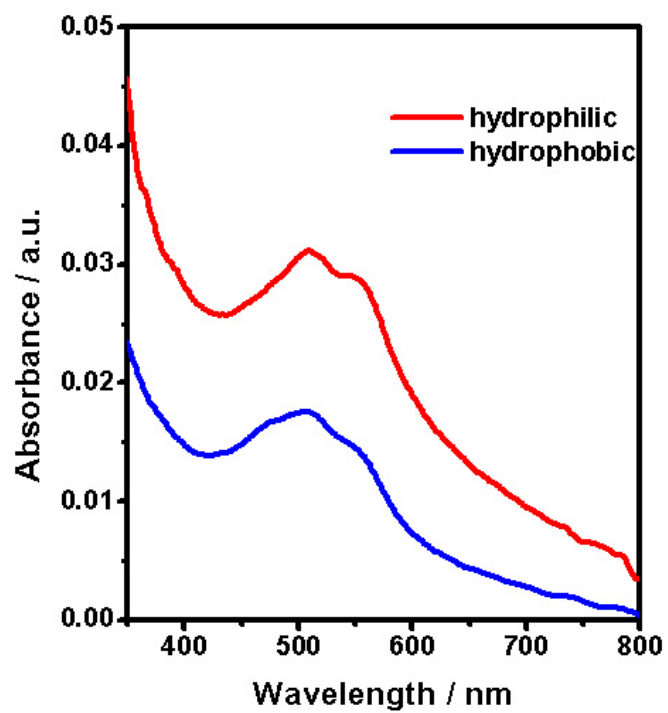

**Figure S3** UV-vis absorption spectra taken from the DAAQ nanowire arrays grown on a hydrophilic and a hydrophobic cover glass slides after the same length of deposition time, respectively. Preferred deposition on hydrophilic surface is clearly shown.

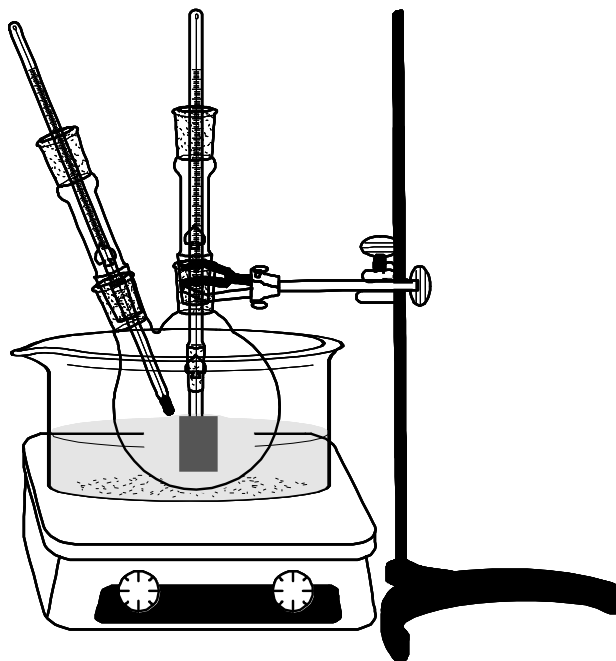

**Figure S4** The simplest setup for preparing DAAQ nanowires.
